# Supplementary material for: Stability of Bioactive Compounds in Olive-Pomace Oil at Frying Temperature and Incorporation into Fried Foods
Source: MDPI journal article supplement (doi:10.3390/foods10122906), 2021-11-24
Supplement: s1 [file s1]

**Figure S1.** GC chromatogram of sterols and triterpenic alcohols from olive pomace oil

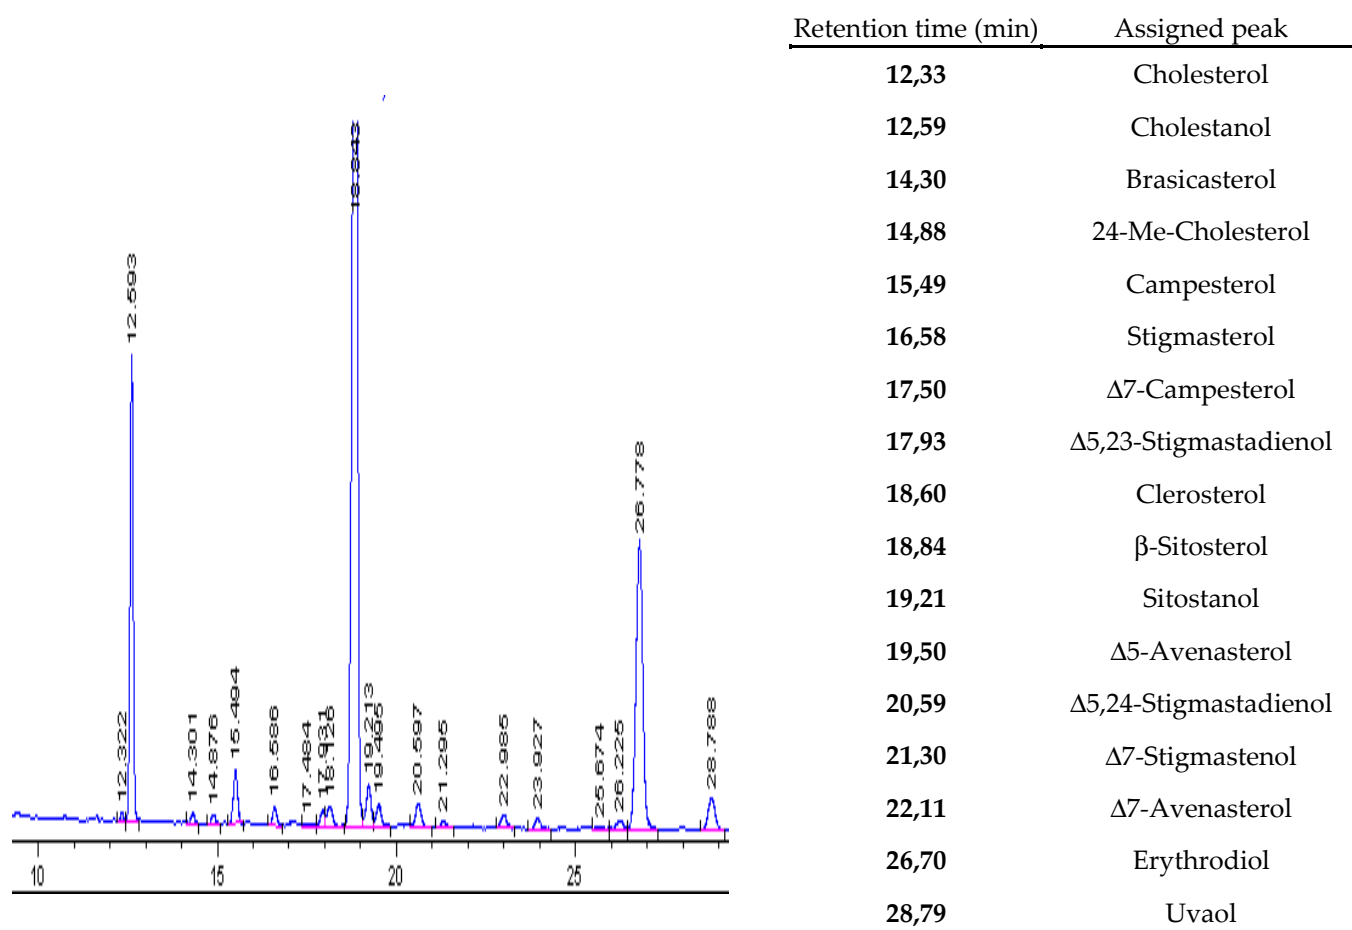

Capillary Column: Bonded-phase 5% diphenyl-95% dimethylpolysiloxane;  
 30-m  $\times$  0.25-mm (i.d.)  $\times$  0.25-mm (film thickness)  
 (HP-5MS Agilent, prod. No. 19091 J-413)

Carrier Gas: Hydrogen at a constant pressure, 15 psi.

Injector Temperature: 275°C

Detector Temperature: 320°C

Oven Temperature: 260°C

**Figure S2.** GC chromatogram of aliphatic alcohols from olive pomace oil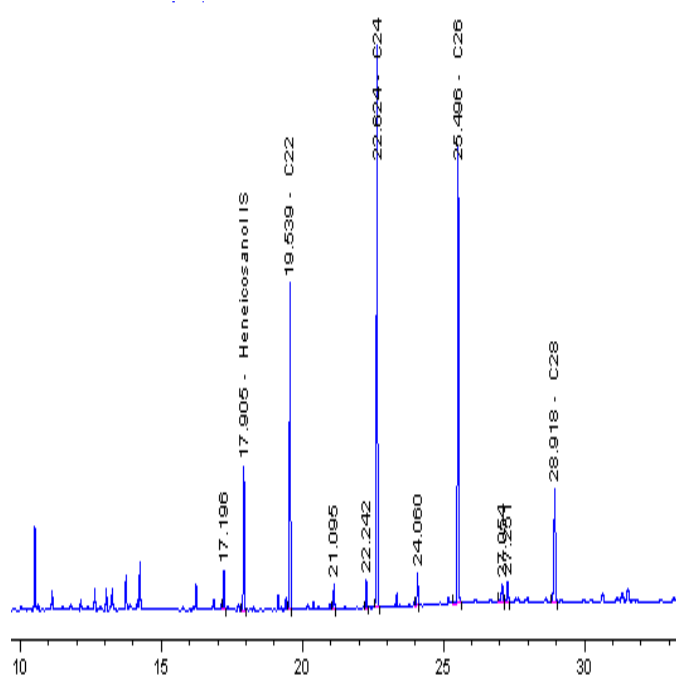

| Retention time (min) | Assigned peak       |
|----------------------|---------------------|
| 17.19                | Eicosanol           |
| 17.90                | Heneicosanol (I.S.) |
| 19.53                | Docosanol           |
| 21.09                | Tricosanol          |
| 22.62                | Tetracosanol        |
| 24.06                | Pentacosanol        |
| 25.49                | Hexacosanol         |
| 27.05                | Heptacosanol        |
| 28.91                | Octacosanol         |

Capillary Column: Bonded-phase 5% diphenyl-95%dimethylpolysiloxane;  
 30-m x 0.25-mm (i.d.) x 0.25-mm (film thickness)  
 (HP-5MS Agilent, prod. No. 19091 J-413)

Carrier Gas: Hydrogen at a constant pressure, 15 psi.

Injector Temperature: 275°C

Detector Temperature: 300°C

Oven Temperature: 180°C
